# Supplementary material
Source: Frontiers journal article supplement (https://www.frontiersin.org/articles/401373)
Supplement: Presentation_1.PDF [file Presentation_1.PDF]

# *Supplementary Material*

## **SnO<sub>2</sub>/Graphene Nanoplatelet Nanocomposites: Solid-State Method Synthesis with High Ethanol Gas-Sensing Performance**

**Run Zhang<sup>1,2</sup>, Jian-Bo Jia<sup>1,2\*</sup>, Jian-Liang Cao<sup>1,2</sup> and Yan Wang<sup>1,3\*</sup>**

<sup>1</sup> The Collaboration Innovation Center of Coal Safety Production of Henan Province, Henan Polytechnic University, Jiaozuo, China, <sup>2</sup> College of Chemistry and Chemical Engineering, Henan Polytechnic University, Jiaozuo, China, <sup>3</sup> School of Safety Science and Engineering, State Key Laboratory Cultivation Base for Gas Geology and Gas Control, Henan Polytechnic University, Jiaozuo, China

\*Correspondence: [jiajianbo@hpu.edu.cn](mailto:jiajianbo@hpu.edu.cn) (J. J.); [yanwang@hpu.edu.cn](mailto:yanwang@hpu.edu.cn) (Y.W.)

### **Experimental**

#### **Materials**

K<sub>2</sub>FeO<sub>4</sub> was purchased from Macklin Biochemical Co., Ltd. (Shanghai, China). Graphite flake with an average size of 100 mesh was supplied by Qingdao graphite company (Shandong, China). Tin(IV) chloride pentahydrate (SnCl<sub>4</sub>·5H<sub>2</sub>O, 99.0%), sodium hydroxide (NaOH), and polyethylene glycol 400 (PEG-400) were purchased from Sinopharm Chemical Reagent Co., Ltd (Beijing, China).

#### **Preparation of GNP**

K<sub>2</sub>FeO<sub>4</sub>, a hexavalent iron salt, is a powerful oxidizing agent, and its oxidizing ability is strongly dependent on pH, especially in an acidic environment, where its redox potential is the highest (Mao et al., 2006). K<sub>2</sub>FeO<sub>4</sub>/H<sub>2</sub>SO<sub>4</sub> is an effective, nondestructive and green oxidation system for oxidative functionalization of carbon nanotubes (Zhang et al., 2015). In this oxidation system, the sp<sup>3</sup>-hybridized carbon atoms were selectively oxidized, but the C=C bonds were entirely unaffected. Although sp<sup>2</sup>-hybridized carbon atoms wouldn't be oxidized in K<sub>2</sub>FeO<sub>4</sub>/H<sub>2</sub>SO<sub>4</sub>, FeO<sub>4</sub><sup>2-</sup> was formed whose penetrability was strong and could speedily intercalate into the interlayer spacing of graphite (Peng et al., 2015). Furthermore, FeO<sub>4</sub><sup>2-</sup> reacts with H<sub>2</sub>O to produce O<sub>2</sub>, and the reaction rate is high. The instantaneously excessive

pressure of O<sub>2</sub> in the interlayer spacing of graphite might weaken the conjugate forces between pristine graphitic lamellae. So herein, we propose a simple and fast methodology for the preparation of GNPs via K<sub>2</sub>FeO<sub>4</sub> as an intercalator.

GNP was prepared by following steps: 1.0 g flake graphite and 30.0 mL of concentrated sulfuric acid were loaded into a 50 mL beaker, then 5.0 g K<sub>2</sub>FeO<sub>4</sub> was slowly added to the mixture at room temperature under magnetic stirring. The mixture was sonicated for 1h and stirred at 40 °C for 3h. The resulting mixture was centrifuged, the precipitate was poured into 200 mL of cold water, and settled for 2 h to sediment the solid GNP. After repeated centrifugation and water-washing, the obtained GNP was freeze-dried, collected and stored in a desiccators.

## Characterization

The phase and crystallinity of the samples were examined using X-ray diffraction (XRD, Cu K $\alpha$ , Bruker-AXSD8) (Bruker, Madison, WI, USA) with a wavelength of 0.154 nm in step of 10°(2 $\theta$ ) min<sup>-1</sup> from 10° to 90°(2 $\theta$ ). The morphologies and structures of the as-prepared products were directly observed through field emission scanning electron microscopy (FESEM, Quanta™250 FEG) (FEI, Eindhoven, The Netherlands) and transmission electron microscopy (TEM, JEOL JEM-2100 microscope) (JEOL, Tokyo, Japan). Thermal gravity and differential scanning calorimeter (TG–DSC) was carried out on a TA-SDT Q600 (TA Instruments, New Castle, DE, USA) at a heating rate of 10 °Cmin<sup>-1</sup> at an air atmosphere. The porous feature of the samples were characterized by the N<sub>2</sub> adsorption-desorption measurement (Quantachrome Autosorb-iQ sorption analyzer) (Quantachrome, Boynton Beach, FL, USA). Before carrying out the measurement, the samples were degassed at 100°C for more than 12 h. The specific surface areas (S<sub>BET</sub>) and the pore diameter distributions were determined from Nitrogen adsorption–desorption isotherms.

## Sensor fabrication and measurement

The gas sensing property of the as-prepared composite to ethanol was tested by the intelligent gas-sensing analysis system (CGS-4TPs) (Beijing Elite Co., Ltd., Beijing, China). Figure S1 shows a simple device schematic diagram. The relative humidity is 34% and the temperature is 25 °C in the test chamber in the process of the gas-sensing test. The gas sensors were made in a conventional way (Sun et al., 2016). The way is

demonstrated as follows: a small amount of the as-prepared products were fully ground in an agate mortar with a few drops of ethanol. Then, the pastes were equably spread on a ceramic substrate (13.4 mm × 7 mm) with interdigitated Ag-Pd electrodes to form the thin film. To improve the stability and repeatability of the gas sensors, the substrate was aged at 180 °C for 24 h before starting the test. Response of the gas sensor was defined as:  $\text{Response} = R_a/R_g$  (Where,  $R_a$  and  $R_g$  were the resistances of the sensor measured in air and in test gas, respectively.)

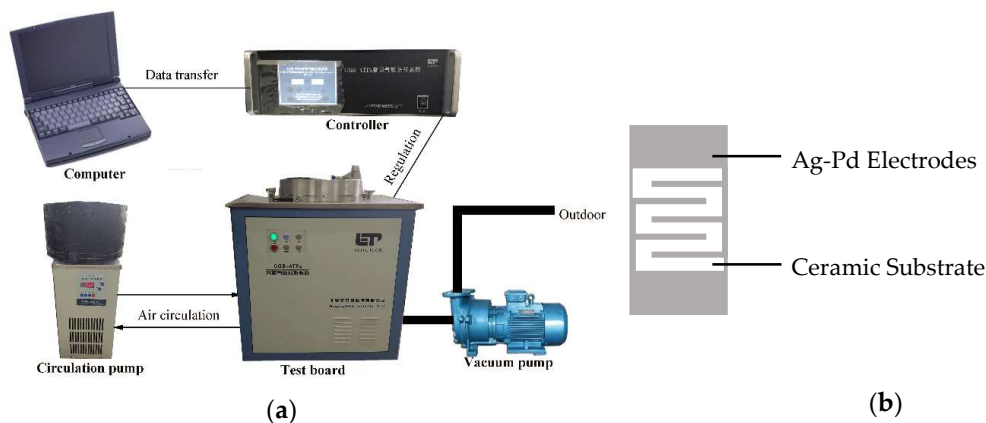

**FIGURE S1** (a) The CGS-4TPS gas-sensing test system, and (b) the gas sensor substrate.

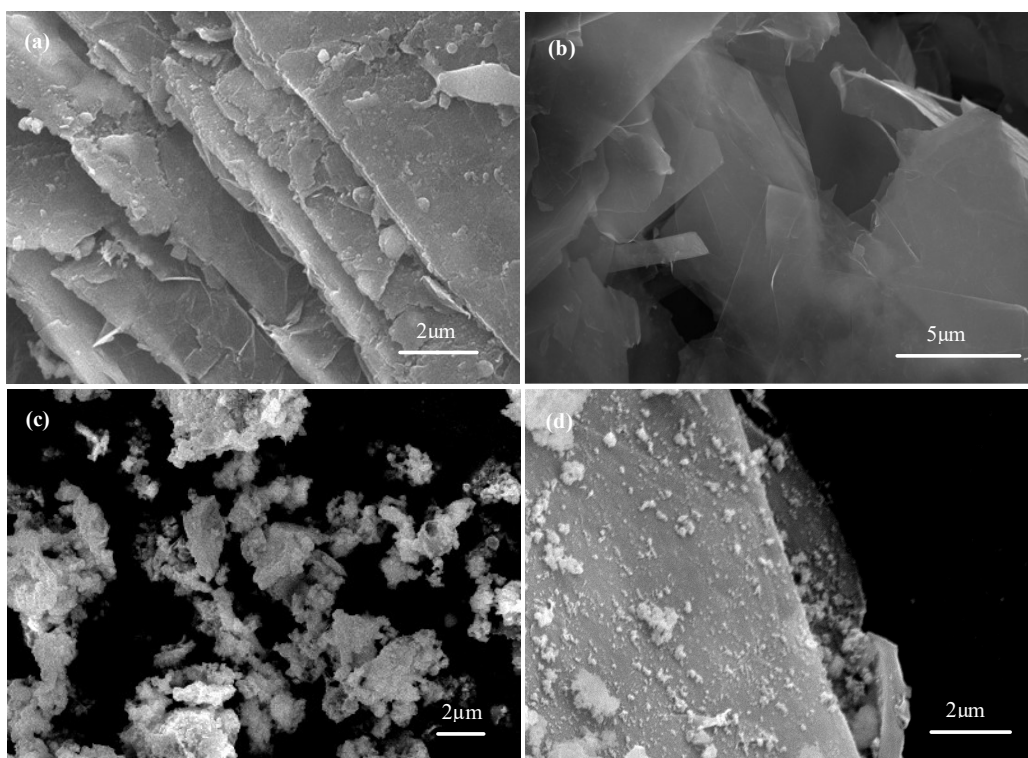

**FIGURE S2** Scanning electron microscope (SEM) images of (a) pristine graphite, (b) GNP, (c) SnO<sub>2</sub> nanoparticles, and (d) SnO<sub>2</sub>/GNP-5 nanocomposite.

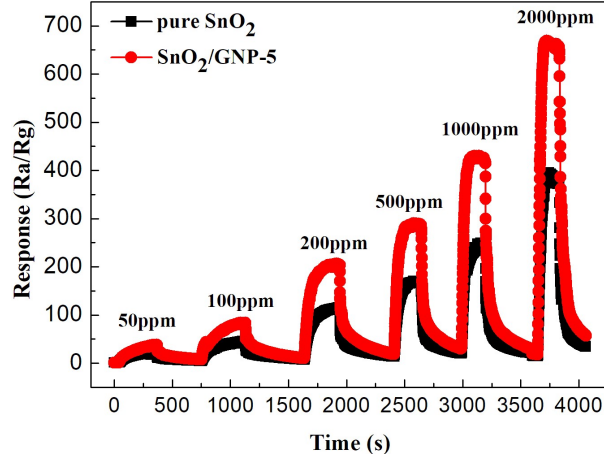

**FIGURE S3** The responses of sensors ( $\text{SnO}_2$  and  $\text{SnO}_2/\text{GNP-5}$ ) versus different concentrations of ethanol at 280 °C.

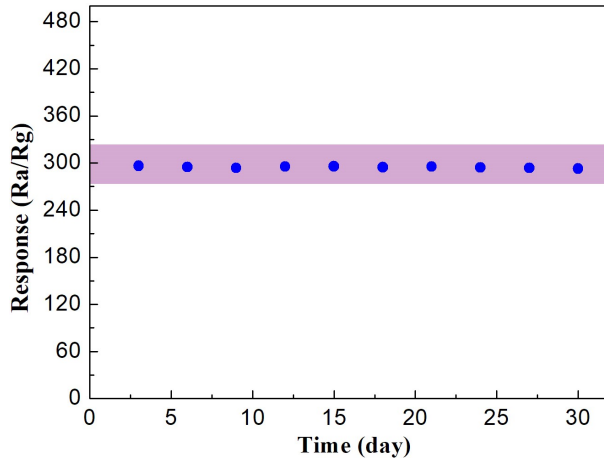

**FIGURE S4** The stability curve of  $\text{SnO}_2/\text{GNP-5}$  to 500 ppm of ethanol in 30 days.

**TABLE S1** Comparison of the gas sensing properties of various  $\text{SnO}_2$ -based material to ethanol.

| Sensing materials           | Ethanol concentration (ppm) | Temperature (°C) | Response (Ra/Rg) | Ref.                                  |
|-----------------------------|-----------------------------|------------------|------------------|---------------------------------------|
| $\text{SnO}_2$ nanowires    | 100                         | 360              | 31               | [33] (Phadungdhitidhada et al., 2011) |
| $\text{SnO}_2$ nanotubes    | 200                         | 300              | 16.7             | [34] (Zhang et al., 2013)             |
| $\text{SnO}_2$ nanorods     | 100                         | 300              | 30.7             | [35] (Chen et al., 2006)              |
| $\text{SnO}_2$ nanoflowers  | 100                         | 300              | 47.29            | [36] (Yu et al., 2016)                |
| $\text{SnO}_2$ nanoflowers  | 200                         | 240              | 62.2             | [37] (Li et al., 2016)                |
| RGO/hollow $\text{SnO}_2$   | 100                         | 300              | 70.4             | [38] (Zito et al., 2017)              |
| Pure $\text{SnO}_2$         | 100                         | 280              | 46               | this work                             |
| $\text{SnO}_2/\text{GNP-5}$ | 100                         | 280              | 94.6             | this work                             |

## References

- Mao, W., Wang, J., Xu, Z., Niu, Z., Zhang, J. (2006). Effects of the oxidation treatment with  $K_2FeO_4$  on the physical properties and electrochemical performance of a natural graphite as electrode material for lithium ion batteries. *Electrochem. Commun.* 8, 1326–1330. doi: 10.1016/j.elecom.2006.06.011
- Zhang, Z., Xu, X. (2006). Nondestructive covalent functionalization of carbon nanotubes by selective oxidation of the original defects with  $K_2FeO_4$ . *Appl. Surf. Sci.* 346, 520–527. doi: 10.1016/j.apsusc.2015.04.026
- Peng, L., Xu, Z., Liu, Z., Wei, Y., Sun, H., Li, Z., et al. (2015). An iron-based green approach to 1-h production of single-layer graphene oxide. *Nat. Commun.* 6, 5716. doi: 10.1038/ncomms6716
- Sun, G., Chen, H., Li, Y., Ma, G., Zhang, S., Jia, T., et al. (2016). Synthesis and triethylamine sensing properties of mesoporous  $\alpha-Fe_2O_3$  microrods. *Mater. Lett.* 178, 213–216. doi: 10.1016/j.matlet.2016.04.209
- Phadungdhithidhada, S., Thanasanvorakun, S., Mangkorntong, P., Choopun, S., Mangkorntong, N., Wongratanaphisan, D. (2011).  $SnO_2$  nanowires mixed nanodendrites for high ethanol sensor response. *Curr. Appl. Phys.* 11, 1368–1373. doi: 10.1016/j.cap.2011.04.007
- Zhang, J., Guo, J., Xu, H., Cao, B. (2013). Reactive-template fabrication of porous  $SnO_2$  nanotubes and their remarkable gas-sensing performance. *ACS Appl. Mater. Interfaces* 5, 7893–7898. doi: 10.1021/am4019884
- Chen, Y., Nie, L., Xue, X., Wang, Y., Wang, T. (2006). Linear ethanol sensing of  $SnO_2$  nanorods with extremely high sensitivity. *Appl. Phys. Lett.* 88, 083105. doi: 10.1063/1.2166695
- Yu, X., Zeng, W. (2016). Fabrication and gas-sensing performance of nanorod-assembled  $SnO_2$  nanostructures. *J. Mater. Sci.: Mater. Electron.* 27, 7448–7453. doi: 10.1007/s10854-016-4721-0
- Li, T., Zeng, W., Long, H., Wang, Z. (2016). Nanosheet-assembled hierarchical  $SnO_2$  nanostructures for efficient gas-sensing applications. *Sens. Actuat. B* 231, 120–128. doi: 10.1016/j.snb.2016.03.003
- Zito, C.A., Perfecto, T.M., Volanti, D.P. (2017). Impact of reduced graphene oxide on the ethanol sensing performance of hollow  $SnO_2$  nanoparticles under humid atmosphere. *Sens. Actuat. B* 244, 466–474. doi: 10.1016/j.snb.2017.01.015
